# Supplementary material for: Correlation of placental microbiota with fetal macrosomia and clinical characteristics in mothers and newborns
Source: PubMed Central journal article supplement (PMC5669892; doi:10.18632/oncotarget.19319), 2017-07-18
Supplement: oncotarget-08-82314-s001.pdf [file oncotarget-08-82314-s001.pdf]

# Correlation of placental microbiota with fetal macrosomia and clinical characteristics in mothers and newborns

## SUPPLEMENTARY MATERIALS

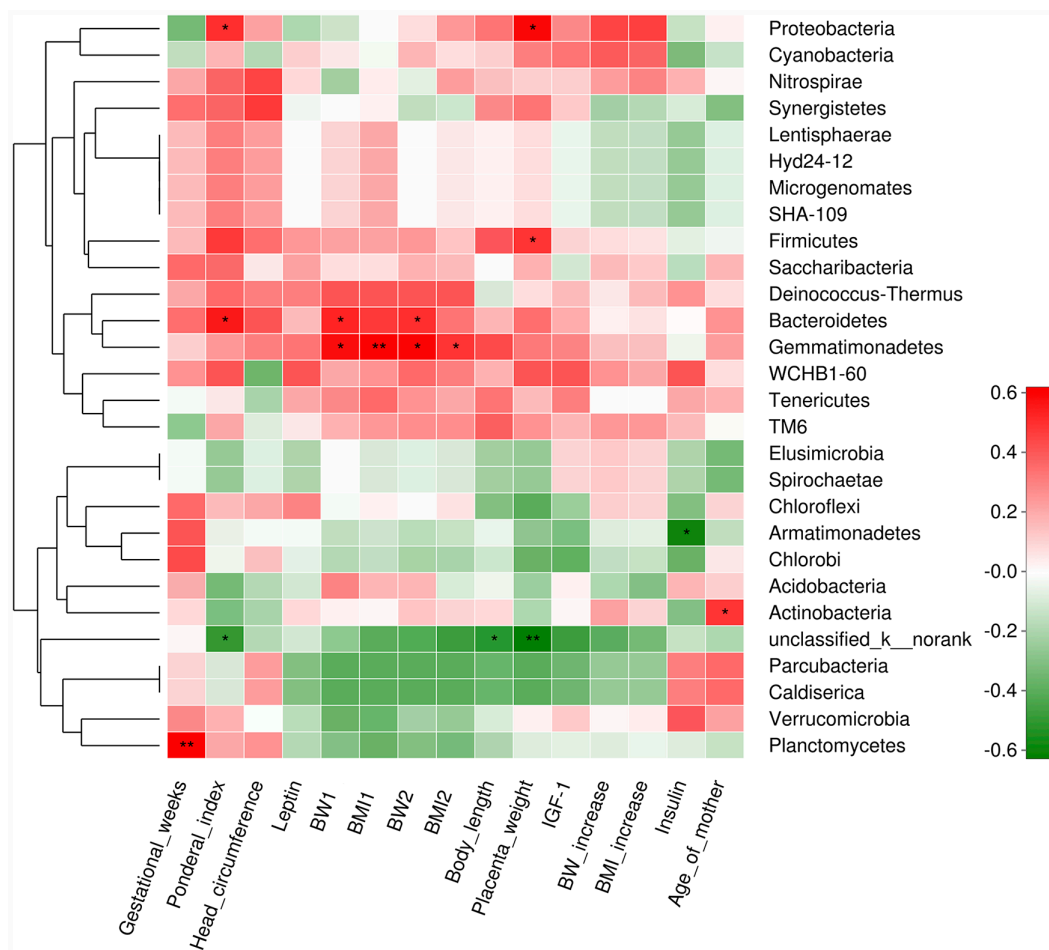

**Supplementary Figure 1: Correlation analyses between identified phyla of placental microbiota and clinical parameters.** Correlation analyses between relative abundance (%) of specific phylum and clinical parameters were performed by using Spearman’s correlation analyses. n = 10, in each group. (\*) represents the specific phylum whose abundance were significantly correlated with certain clinical parameters. The color of the spots in the right panel represents R-value of Spearman’s correlation between the phylum and clinical parameters. BW, body weight; BMI, body mass index; BW1, body weight at the beginning of 1st trimester; BMI1, BMI at the beginning of 1st trimester; BW2, body weight at the end of 3rd trimester; BMI2, body mass index at the end of 3rd trimester; IGF-1, insulin-like growth factor-1.

Supplementary Table 1: Clinical characteristics and anthropometric measurements of each newborn and mother

| IDs    | Sex | Mode of delivery | Infants          |         |                         |         |        |          |           | Mothers |       |      |       |      |       | Umbilical cord blood |                |               |
|--------|-----|------------------|------------------|---------|-------------------------|---------|--------|----------|-----------|---------|-------|------|-------|------|-------|----------------------|----------------|---------------|
|        |     |                  | Birth weight (g) | BL (cm) | PI (kg/m <sup>3</sup> ) | HC (cm) | PW (g) | GA (wks) | Age (yrs) | BW1     | BMI1  | BW2  | BMI2  | BW↑  | BMI↑  | Insulin (μU/mL)      | Leptin (ng/mL) | IGF-1 (ng/mL) |
| Ctl 1  | F   | C-section        | 3030             | 48      | 27.4                    | 35      | 540    | 39.29    | 38        | 45      | 17.58 | 59.5 | 23.24 | 14.5 | 5.66  | 20.74                | 4.96           | 31.1          |
| Ctl 2  | F   | C-section        | 3170             | 48      | 28.66                   | 32.8    | 620    | 38.57    | 28        | 50      | 19.53 | 65   | 25.39 | 15   | 5.86  | 7.29                 | 14.53          | 60.42         |
| Ctl 3  | M   | C-section        | 3120             | 50      | 24.96                   | 34.5    | 545    | 39       | 42        | 62      | 21.97 | 78   | 27.64 | 16   | 5.67  | 10.41                | 10.9           | 40.39         |
| Ctl 4  | F   | C-section        | 3200             | 51      | 24.12                   | 32      | 550    | 41       | 26        | 49      | 19.14 | 62   | 24.22 | 13   | 5.08  | 13.62                | 12.57          | 35            |
| Ctl 5  | M   | C-section        | 3010             | 49      | 25.58                   | 34      | 600    | 39       | 27        | 56      | 20.08 | 75   | 26.89 | 19   | 6.81  | 9.71                 | 7.35           | 67.48         |
| Ctl 6  | F   | C-section        | 3110             | 49      | 26.43                   | 33      | 650    | 38.86    | 32        | 47      | 17.91 | 70   | 26.67 | 23   | 8.76  | 10.32                | 4.03           | 64.09         |
| Ctl 7  | M   | C-section        | 3180             | 48      | 28.75                   | 34.9    | 630    | 39       | 33        | 51      | 19.2  | 65   | 24.46 | 14   | 5.26  | 7                    | 3.88           | 25.5          |
| Ctl 8  | F   | C-section        | 3200             | 50      | 25.6                    | 34      | 725    | 38.43    | 29        | 69      | 23.32 | 80.5 | 27.21 | 11.5 | 3.89  | 17.68                | 5.69           | 38.98         |
| Ctl 9  | M   | C-section        | 3200             | 50      | 25.6                    | 34.5    | 640    | 38.43    | 32        | 56      | 19.84 | 76   | 26.93 | 20   | 7.09  | 21.32                | 6.5            | 57.92         |
| Ctl 10 | M   | C-section        | 3250             | 49      | 27.62                   | 34      | 520    | 38.72    | 35        | 50      | 19.53 | 64   | 25.00 | 14   | 5.47  | 13.31                | 4.56           | 98.97         |
| M1     | F   | C-section        | 4775             | 52      | 33.96                   | 32.5    | 1150   | 40.43    | 30        | 65      | 23.31 | 88.5 | 31.73 | 23.5 | 8.42  | 50.18                | 26.9           | 237.21        |
| M2     | M   | C-section        | 4680             | 53      | 31.44                   | 37.5    | 1065   | 40.57    | 27        | 52.5    | 20    | 67.5 | 25.72 | 15   | 5.72  | 17.37                | 9.16           | 91.86         |
| M3     | M   | C-section        | 4640             | 55      | 25.23                   | 34      | 985    | 38       | 36        | 67      | 22.65 | 86   | 29.07 | 19   | 6.42  | 17.31                | 9.12           | 114.7         |
| M4     | M   | C-section        | 4510             | 52      | 32.07                   | 34.8    | 955    | 38       | 28        | 54      | 20.32 | 80   | 30.11 | 26   | 9.79  | 14.68                | 8.78           | 41.63         |
| M5     | M   | C-section        | 4410             | 51      | 33.25                   | 35      | 850    | 39.72    | 29        | 61      | 23.24 | 76   | 28.96 | 15   | 5.72  | 9.28                 | 9.96           | 52.5          |
| M6     | F   | C-section        | 4370             | 53      | 29.35                   | 33.6    | 940    | 39       | 32        | 67      | 24.31 | 83.5 | 30.30 | 16.5 | 5.99  | 18.98                | 14.15          | 100.13        |
| M7     | F   | C-section        | 4290             | 52      | 30.51                   | 36      | 760    | 40.86    | 29        | 58.5    | 22.02 | 82.5 | 31.05 | 24   | 9.03  | 7.12                 | 24.06          | 36.78         |
| M8     | M   | C-section        | 4240             | 50      | 33.92                   | 35.5    | 850    | 40.29    | 30        | 74      | 30.02 | 91.5 | 37.12 | 17.5 | 7.10  | 19.8                 | 21.04          | 77.52         |
| M9     | M   | C-section        | 4220             | 52      | 30.01                   | 34      | 985    | 38       | 29        | 48      | 20.5  | 75   | 32.04 | 27   | 11.54 | 26.63                | 12.37          | 96.93         |
| M10    | M   | C-section        | 4280             | 52      | 30.44                   | 34.2    | 870    | 38       | 36        | 60      | 21.26 | 85   | 30.12 | 25   | 8.86  | 25.31                | 12.88          | 82.7          |

Ctl, control; M, macrosomia; F, female; M, male; C-section: Cesarean section; BL, body length; PI, Ponderal index; HC, head circumference; PW, placenta weight; GA, gestational age; Wks, weeks; Yrs, years old; BW, body weight; BW1, body weight at the beginning of 1st trimester; BW2, body weight at the end of 3rd trimester; BMI, body mass index; BMI1, BMI at the beginning of 1st trimester; BMI2, body mass index at the end of 3rd trimester; BW↑, BW increase during pregnancy; BMI↑, BMI increase during pregnancy; IGF-1, insulin-like growth factor-1.

Supplementary Table 2: Phylotypes significantly different at the genus level

|                                         | Control (proportions) | Macrosomia (proportions) | P value |
|-----------------------------------------|-----------------------|--------------------------|---------|
| <b>Novosphingobium</b>                  | 0.000%                | 0.079%                   | 0.008** |
| <b>Achromobacter</b>                    | 0.048%                | 0.168%                   | 0.021*  |
| <b>Geothrix</b>                         | 0.026%                | 0.000%                   | 0.024*  |
| <b>Acinetobacter</b>                    | 0.142%                | 1.564%                   | 0.024*  |
| <b>Paracoccus</b>                       | 0.000%                | 0.328%                   | 0.045*  |
| <b>Pseudonocardia</b>                   | 0.000%                | 0.905%                   | 0.045*  |
| <b>Woodsholea</b>                       | 0.000%                | 0.347%                   | 0.045*  |
| <b>Nitratireductor</b>                  | 0.006%                | 0.437%                   | 0.048*  |
| <b>Pelomonas</b>                        | 0.002%                | 0.166%                   | 0.049*  |
| <b>Prevotellaceae_NK3B31_group</b>      | 0.448%                | 0.113%                   | 0.028*  |
| <b>Dechloromonas</b>                    | 0.065%                | 0.008%                   | 0.085   |
| <b>Lactococcus</b>                      | 0.192%                | 0.644%                   | 0.052   |
| <b>Faecalibacterium</b>                 | 0.023%                | 0.728%                   | 0.081   |
| <b>Sphingomonas</b>                     | 0.178%                | 0.318%                   | 0.088   |
| <b>Bacteroidales_S24-7_group_norank</b> | 4.584%                | 2.621%                   | 0.092   |
| <b>Gemmatimonadaceae_uncultured</b>     | 0.001%                | 0.609%                   | 0.055   |
| <b>Bacteria_unclassified</b>            | 53.290%               | 21.341%                  | 0.003** |
| <b>Alcaligenaceae_unclassified</b>      | 0.949%                | 3.311%                   | 0.005** |
| <b>Gallionellaceae_unclassified</b>     | 0.006%                | 0.000%                   | 0.082   |
| <b>Lachnospiraceae_unclassified</b>     | 0.119%                | 0.717%                   | 0.084   |

Data of placental microbiota were showed as relative abundance (%) of genera in each group. Statistical analysis was performed by the Mann-Whitney U test. The comparisons of genera with no statistically significant difference ( $P \geq 0.1$ ) were not shown. n = 10, in each group. \* $P < 0.05$ , \*\* $P < 0.001$  macrosomia vs. control group.
